# Supplementary material for: Relative Importance of Black Carbon, Brown Carbon andAbsorption Enhancement from Clear Coatings in Biomass BurningEmissions
Source: Copernicus journal article supplement (doi:10.5194/acp-2016-1009), 2016-11-18
Supplement: Supplementary file 1 [file acp-2016-1009-supplement.pdf]

## **Supplementary Information For**

### **Relative Importance of Black Carbon, Brown Carbon and Enhanced Absorption from Clear Coatings in Biomass Burning Emissions**

Rudra P. Pokhrel<sup>1</sup>, Eric R. Beamesderfer<sup>1, \*</sup>, Nick L. Wagner<sup>2</sup>, Justin M. Langridge<sup>3</sup>, Daniel A. Lack<sup>4</sup>, Thilina Jayarathne<sup>5</sup>, Elizabeth A. Stone<sup>5</sup>, Chelsea E. Stockwell<sup>6</sup>, Robert J. Yokelson<sup>6</sup> and Shane M. Murphy<sup>1</sup>

<sup>1</sup>Department of Atmospheric Science, University of Wyoming, Laramie, Wyoming, USA

<sup>2</sup>NOAA Earth System Research Laboratory, Chemical Sciences Division, Boulder, Colorado, USA

<sup>3</sup>Observation Based Research, Met Office, Fitzroy Road, Exeter, EX1 3PB, UK

<sup>4</sup>Transport Emissions, Air Quality and Climate Consulting, Brisbane, Australia

<sup>5</sup>Department of Chemistry, University of Iowa, Iowa City, Iowa, USA

<sup>6</sup>Department of Chemistry, University of Montana, Missoula, Montana, USA

\*Now at: School of Geography and Earth Science, McMaster University, Hamilton, Ontario, Canada

Table S1: The slope of dry vs denuded absorption (denuded adjustment factor) for different days of analysis period. 405 nm is the adjustment factor for blue wavelength and 660 nm is adjustment factor for red wavelength.

| Date   | 405 nm | 660 nm |
|--------|--------|--------|
| 27-Oct | 1.57   | 1.03   |
| 28-Oct | 1.55   | 1.02   |
| 29-Oct | 1.52   | 1.00   |
| 30-Oct | 1.52   | 0.96   |
| 31-Oct | 1.28   | 1.34   |
| 1-Nov  | 1.39   | 0.99   |
| 3-Nov  | 1.14   | 0.94   |
| 4-Nov  | 1.18   | 1.09   |
| 5-Nov  | 1.48   | 0.92   |

Table S2: Percentage of absorption due to BC, lensing (coating), and BrC due to BB aerosols at 532 nm estimated from three different approaches. ID is the fire ID assign during FLAME-4 for particular burns. The ratio in the rightmost column is the ratio in BrC absorption estimation by approach 2 over approach 1.

| ID  | Materials             | Approach 1 |      |     | Approach 2 |      |     | Approach 3 |      |     | Ratio |
|-----|-----------------------|------------|------|-----|------------|------|-----|------------|------|-----|-------|
|     |                       | BC         | Coat | BrC | Ratio      | Coat | BrC | BC         | Coat | BrC |       |
| 129 | Pine                  | 75         | 6    | 19  | 48         | 3    | 49  | 48         | 10   | 42  | 2.58  |
| 142 | Pine                  | 69         | 13   | 18  | 59         | 13   | 29  | 59         | 22   | 19  | 1.61  |
| 144 | pine                  | 58         | 25   | 17  | 44         | 20   | 36  | 44         | 29   | 27  | 2.12  |
| 130 | California rice straw | 87         | 3    | 10  | 68         | 3    | 29  | 68         | 13   | 19  | 2.90  |
| 143 | California rice straw | 58         | 6    | 36  | 42         | 5    | 54  | 42         | 11   | 48  | 1.50  |
| 131 | Black Spruce          | 78         | 4    | 18  | 64         | 4    | 32  | 64         | 14   | 22  | 1.78  |
| 134 | Black Spruce          | 74         | 14   | 13  | 60         | 11   | 29  | 60         | 21   | 19  | 2.23  |
| 138 | Organic Hay           | NA         | NA   | NA  | 59         | 22   | 19  | 59         | 33   | 8   | NA    |
| 146 | Organic Hay           | 67         | 4    | 30  | 57         | 0    | 44  | 57         | 6    | 36  | 1.47  |
| 132 | Organic Wheat         | 84         | 1    | 15  | 71         | 1    | 28  | 71         | 11   | 18  | 1.87  |
| 149 | Organic Wheat         | 78         | 11   | 10  | 60         | 8    | 32  | 60         | 18   | 22  | 3.20  |
| 139 | Giant saw grass       | 100        | 0    | 0   | 100        | 0    | 0   | 100        | 0    | 0   | -     |
| 148 | Giant saw grass       | NA         | NA   | NA  | NA         | NA   | NA  | 73         | 10   | 17  | NA    |
| 133 | Conventional Wheat    | 81         | 2    | 18  | 67         | 2    | 31  | 67         | 11   | 21  | 1.72  |
| 135 | Chamise               | 94         | 0    | 6   | 80         | 0    | 21  | 80         | 10   | 10  | 3.50  |
| 136 | Manzanita             | 92         | 0    | 8   | 83         | 0    | 18  | 83         | 11   | 6   | 2.25  |
| 414 | wire grass            | 100        | 0    | 0   | 100        | 0    | 0   | 100        | 0    |     | -     |
| 147 | Sugar cane            | 60         | 7    | 33  | 45         | 5    | 50  | 45         | 12   | 44  | 1.52  |
| 150 | NC peat               | 56         | 4    | 40  | 41         | 1    | 58  | 41         | 7    | 52  | 1.45  |

Table S3: Fitting coefficients for percentage of absorption due to BrC as a function of AAE (Absorption =  $a + b * \log(\text{AAE})$ ) and as a function of EC/OC ( $\log(\text{Absorption}) = a + b * \log(\text{EC/OC})$ ) with Pearson's r values for each fit. Numbers in parentheses are 1 standard deviation of the fitting coefficients.

|                    | Wavelengths | Approaches | a                     | b                     | r     |
|--------------------|-------------|------------|-----------------------|-----------------------|-------|
| Fitting with AAE   | 405 nm      | 1          | -28.90 ( $\pm 4.62$ ) | 136.05 ( $\pm 9.14$ ) | 0.97  |
|                    |             | 2          | 1.27 ( $\pm 2.1$ )    | 121.94 ( $\pm 4.28$ ) | 0.99  |
|                    |             | 3          | -29.02 ( $\pm 2.61$ ) | 157.33 ( $\pm 5.27$ ) | 0.99  |
|                    | 532 nm      | 1          | -7.86 ( $\pm 5.45$ )  | 56.51 ( $\pm 10.80$ ) | 0.82  |
|                    |             | 2          | -1.01 ( $\pm 5.45$ )  | 73.90 ( $\pm 10.80$ ) | 0.88  |
|                    |             | 3          | -11.69 ( $\pm 5.82$ ) | 78.45 ( $\pm 11.7$ )  | 0.86  |
| Fitting with EC/OC | 405 nm      | 1          | 0.97 ( $\pm 0.16$ )   | -0.51 ( $\pm 0.15$ )  | -0.77 |
|                    |             | 2          | 1.50 ( $\pm 0.07$ )   | -0.26 ( $\pm 0.07$ )  | -0.8  |
|                    |             | 3          | 1.04 ( $\pm 0.15$ )   | -0.56 ( $\pm 0.15$ )  | -0.79 |
|                    | 532 nm      | 1          | 0.81 ( $\pm 0.09$ )   | -0.41 ( $\pm 0.08$ )  | -0.86 |
|                    |             | 2          | 1.24 ( $\pm 0.06$ )   | -0.28 ( $\pm 0.06$ )  | -0.86 |
|                    |             | 3          | 1.09 ( $\pm 0.10$ )   | -0.30 ( $\pm 0.10$ )  | -0.72 |

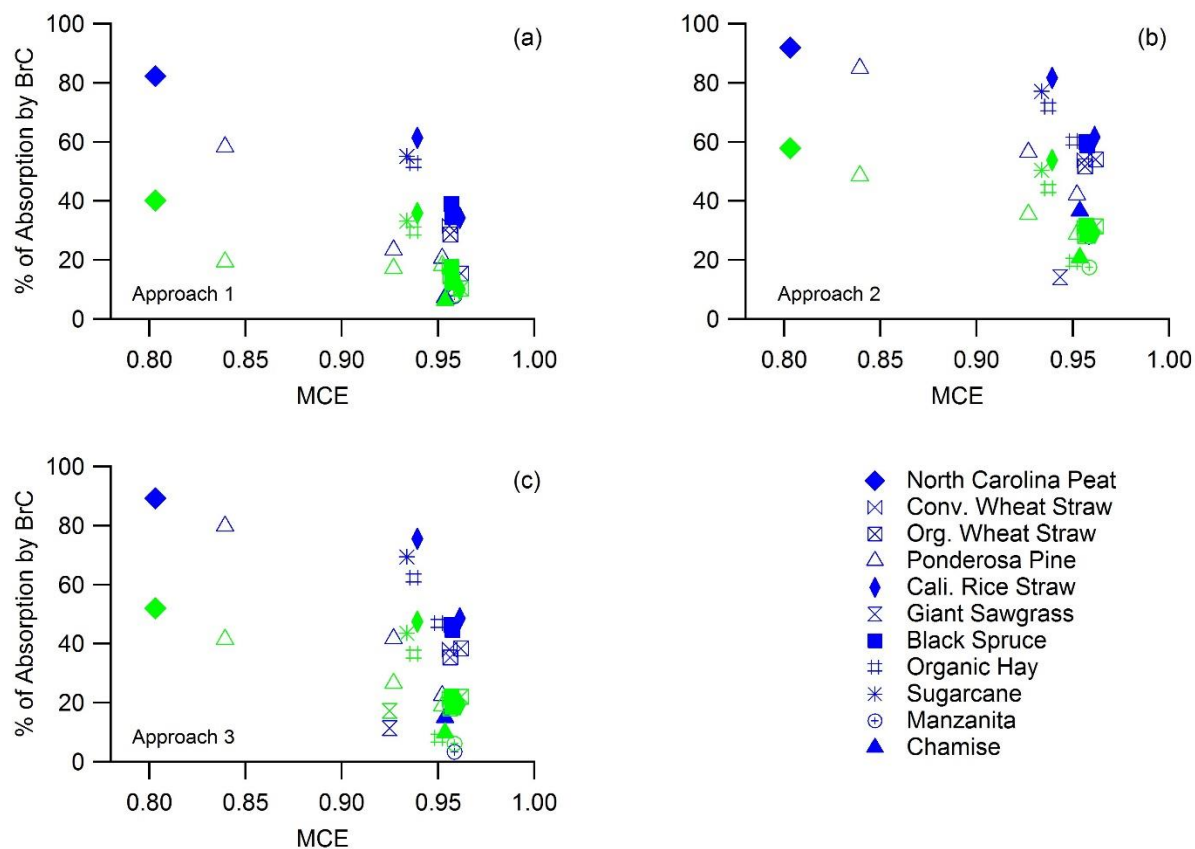

Figure S1: Percentage of absorption due to BrC vs. MCE. (a) approach 1, (b) approach 2, and (c) approach 3. Blue symbols are for absorption at 405 nm and green symbols are for absorption at 532 nm.
